# Supplementary material for: SCFβ‐TrCP ubiquitinates CHK1 in an AMPK‐dependent manner in response to glucose deprivation
Source: PubMed Central journal article supplement (PMC6360357; doi:10.1002/1878-0261.12403), 2018-12-03
Supplement: MOL2-13-307-s001.pdf [file MOL2-13-307-s001.pdf]

## SUPPLEMENTAL INFORMATION

### SCF <sup>$\beta$ -TrCP</sup> Ubiquitinates CHK1 in an AMPK-Dependent Manner in Response to Glucose Deprivation

Ying Ma,<sup>1,2,3,6</sup> Danrui Cui,<sup>1,2,6</sup> Xiufang Xiong,<sup>2</sup> Hiroyuki Inuzuka,<sup>3,4</sup> Wenyi Wei,<sup>3</sup> Yi Sun,<sup>2,5</sup> Brian J. North<sup>3,#</sup> and Yongchao Zhao<sup>1,2,#</sup>

<sup>1</sup>Key Laboratory of Combined Multi-Organ Transplantation, Ministry of Public Health, First Affiliated Hospital, Zhejiang University School of Medicine, Hangzhou, 310003 China

<sup>2</sup>Institute of Translational Medicine, Zhejiang University School of Medicine, Hangzhou, 310029 China

<sup>3</sup>Department of Pathology, Beth Israel Deaconess Medical Center, Harvard Medical School, Boston, MA 02115 USA

<sup>4</sup>Center for Advanced Stem Cell and Regenerative Research, Tohoku University Graduate School of Dentistry, Sendai, 980-8575 Japan

<sup>5</sup>Division of Radiation and Cancer Biology, Department of Radiation Oncology, University of Michigan, Ann Arbor, MI 48109 USA

<sup>6</sup>These authors contributed equally to this work.

#### #Correspondence

yongchao@zju.edu.cn (Y.Z.)

bnorth@bidmc.harvard.edu (B.J.N.)

#### Supplemental Figures:

**Fig S1:** Glucose deprivation induces ubiquitination of CHK1.

**Fig S2:** Degradation of CHK1 is largely dependent on a  $\beta$ -TrCP degron domain.

**Fig S3:** Inhibition of AKT does not influence glucose deprivation-induced CHK1 degradation.

**Fig S4:** CHK1 is phosphorylated by AMPK upon glucose deprivation.

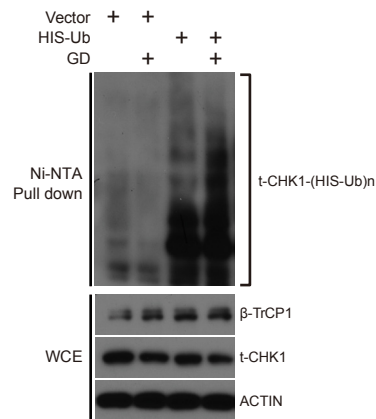

**Fig. S1. Glucose deprivation induces ubiquitination of CHK1.** HEK293T cells were transfected with His-Ub as indicated. Cells grown in normal glucose or glucose-free media and treated with 20  $\mu$ M MG132 for 6 hrs. Cells were lysed under denaturing conditions and Ub conjugated proteins were pulled down with Ni-NTA resin. Pull downs and whole cell extracts were separated on SDS-PAGE and immunoblotted for CHK1,  $\beta$ -TrCP1, and ACTIN.

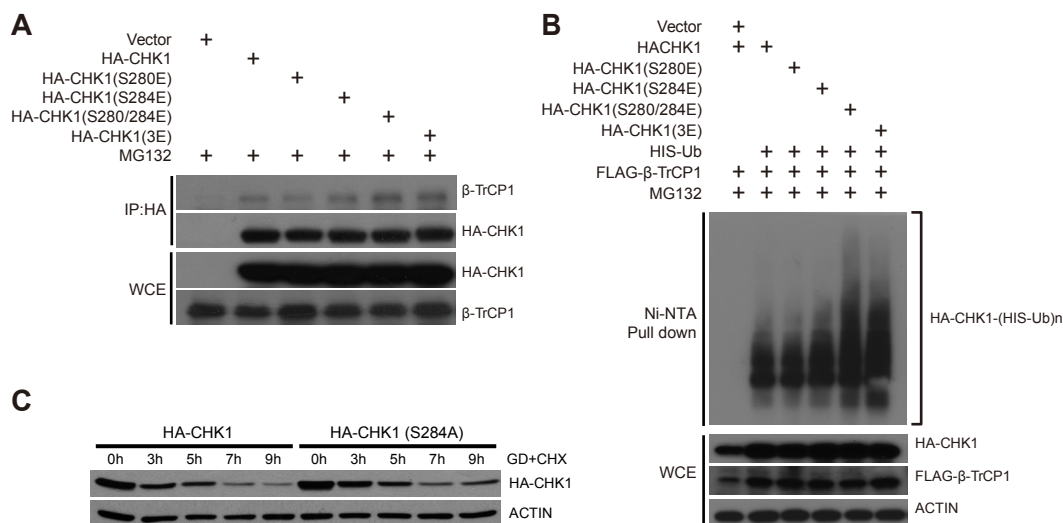

**Fig. S2. Degradation of CHK1 is largely dependent on a  $\beta$ -TrCP1 degron domain.**

**(A)** HEK293T cells were transfected with control vector, HA-CHK1 WT, HA-CHK1 S280E, HA-CHK1 S284E, HA-CHK1 S280/284E, HA-CHK1 T279,S280/284E (3E). Cells were treated with 5  $\mu$ M MG132 for 12 hrs, lysed and immunoprecipitated with agarose conjugated HA antibody. Immunoprecipitates and whole cell extracts were separated on SDS-PAGE and immunoblotted for  $\beta$ -TrCP1 and HA. **(B)** HEK293T cells were transfected with FLAG- $\beta$ -TrCP1 along with either control vector, HA-CHK1 WT, HA-CHK1 S280E, HA-CHK1 S284E, HA-CHK1 S280/284E, HA-CHK1 T279,S280/284E (3E), and His-Ub as indicated. Cells were grown in normal glucose media and treated with 5  $\mu$ M MG132 for 12 hrs before harvest. Cells were lysed under denaturing conditions and Ub conjugated proteins were pulled down with Ni-NTA resin. Pull downs and whole cell extracts were separated on SDS-PAGE and immunoblotted for HA, FLAG, and ACTIN. **(C)** HEK293 cells were transfected with HA-CHK1 WT or FLAG-CHK1 S284A and grown in glucose-free media with 100 mg/ml CHX for indicated times. Cells were harvested, lysed, and protein separated on SDS-PAGE and immunoblotted for HA and ACTIN.

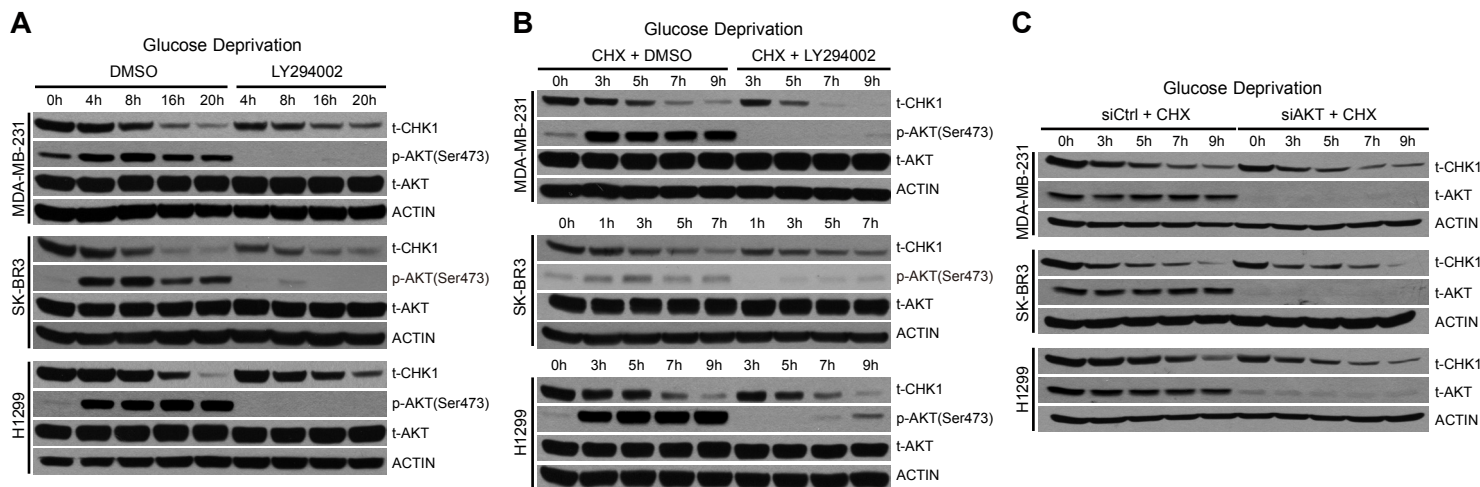

**Fig. S3. Inhibition of AKT does not influence glucose deprivation-induced CHK1 degradation.** (A) MDA-MB-231, SK-BR3, and H1299 cells were transferred to glucose-free media and treated with either DMSO or 25  $\mu$ M LY294002 for indicated times. Cells were harvested, lysed, and protein was separated on SDS-PAGE and immunoblotted for CHK1, p-Akt, t-Akt (Ser473), and ACTIN. (B) MDA-MB-231, SK-BR3, and H1299 cells were grown in glucose-free media and treated with 100 mg/ml CHX and either DMSO or 25  $\mu$ M LY294002 for indicated times. Cells were harvested, lysed, and protein was separated on SDS-PAGE and immunoblotted for CHK1, p-Akt (Ser473), t-Akt, and ACTIN. (C) MDA-MB-231, SK-BR3, and H1299 cells were transfected with siCtrl and siAKT. After 72 hrs, cells were switched to glucose-free media containing 100 mg/ml CHX for indicated times. Cells were harvested, lysed, and protein was separated on SDS-PAGE and immunoblotted for CHK1, Akt, and ACTIN.

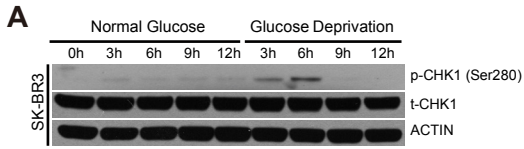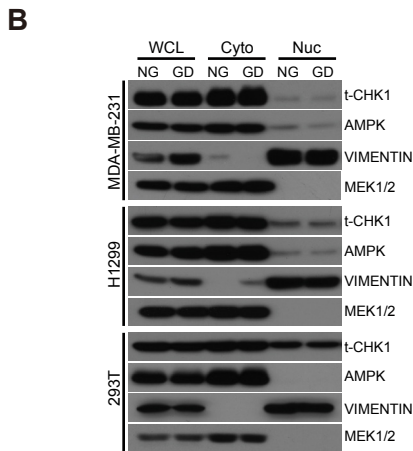

**Fig. S4. CHK1 is phosphorylated by AMPK upon glucose deprivation.**

**(A)** SK-BR3 cells were grown in normal glucose and glucose-free media in the presence of 10  $\mu$ M MG132 and harvested at indicated times. Following lysis, protein was separated on SDS-PAGE and immunoblotted for p-CHK1, t-CHK1, and ACTIN. **(B)** MDA-MB-231, H1299, and HEK293T cells were grown in normal glucose and glucose-free media for 3 hrs. Cells were then harvested and separated into various cellular compartments including whole cell (WCL), cytoplasm (Cyto), and nuclear (Nuc) fractions. Each fraction was separated on SDS-PAGE and immunoblotted for CHK1, AMPK, Vimentin (nuclear marker), and MEK1/2 (cytoplasmic marker).
